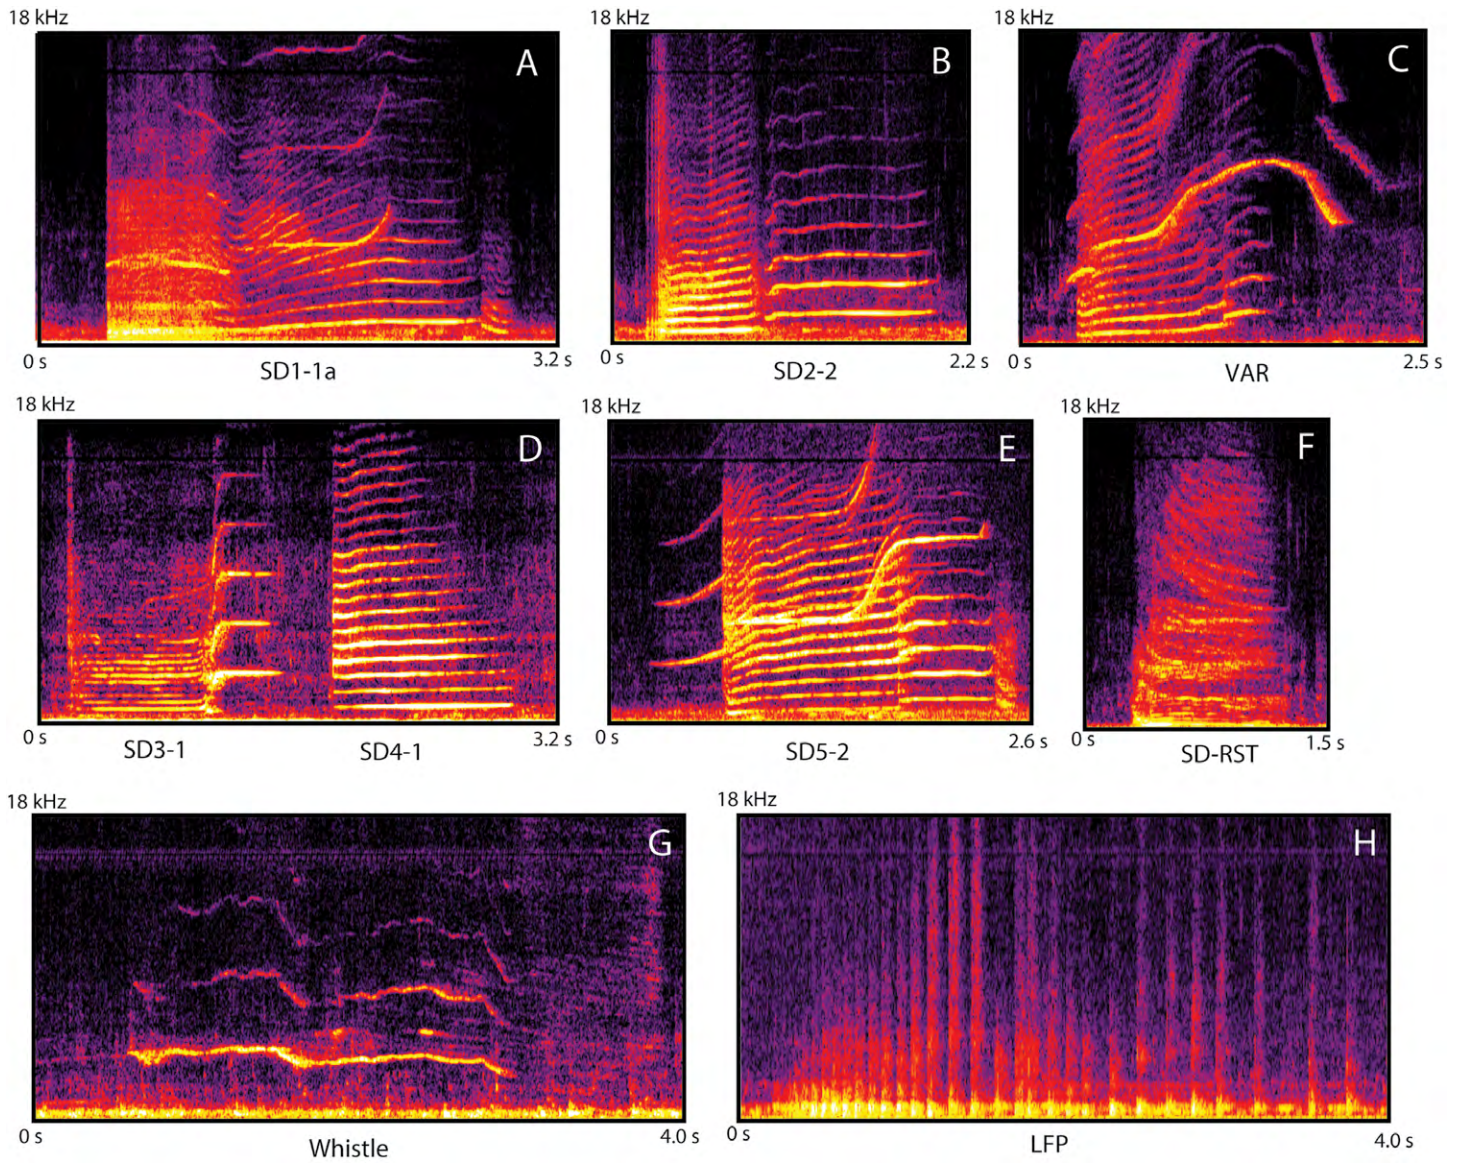

**Fig. S1. Examples of stereotyped calls and categorical vocalizations in the Icelandic-origin dialect.** Those indicated with an “SD” code are discrete, stereotyped calls. The remainder are the unsterotyped, categorized vocalizations, adult variable [VAR], whistle, and low-frequency pop trains [LFP].

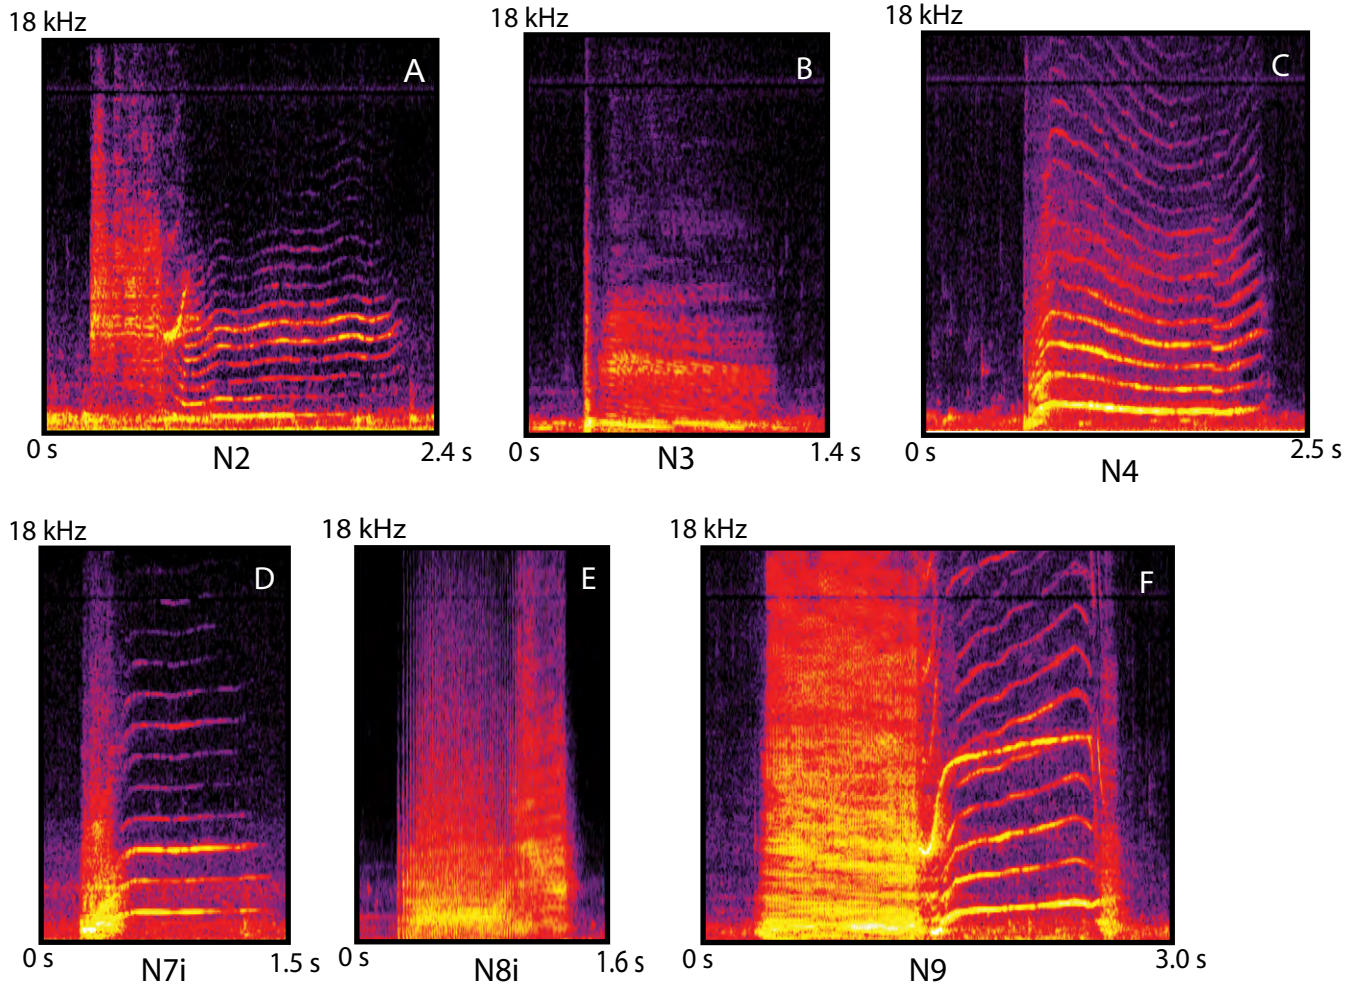

**Fig. S2. Spectrograms of discrete, stereotyped call types produced by F1.** (A) N2, (B) N3 (resting call), (C) N4, (D) N7i, (E) N8i, (F) N9. Call type codes correspond to published designations (Ford, 1984; 1987).

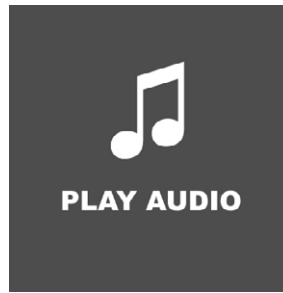

**Audio 1. U3(DEBC[R]) calls produced by M8 and M4.** Spectrograms of the calls in Fig. 3A,B. M8's call is followed immediately by a second call type, U4(FG). The soundfile was manipulated by low-pass filtering at 18 kHz with a 10-pole Butterworth filter in Adobe Audition and smoothing the amplitude envelopes of each clip.

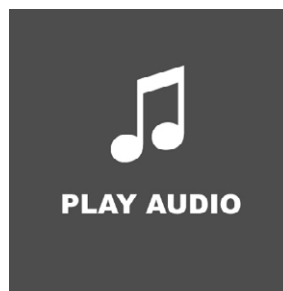

**Audio 2. U4(F[G]) calls produced by M8 and M6.** The sounds correspond to spectrograms in Fig. 3C,D. The soundfile was manipulated by converting to a common sample rate (22 kHz) and smoothing the amplitude envelopes of each clip.

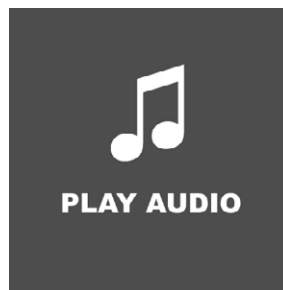

**Audio 3. SD5-2 calls produced by M8 and M6.** The sounds correspond to images in Fig. 4A, C. The soundfile was manipulated by low-pass filtering at 18 kHz with a 10-pole Butterworth filter in Adobe Audition and smoothing the amplitude envelopes of each clip.



**Table S1. Counts of the stereotyped call types in the Icelandic-origin dialect.**

Categorized vocalizations are also given by whale. Period indicated (01-03 for 2001-2003; 05-06 for 2005-2006). Column headings indicate the subject and period. Rank order of the five most common call types or categories indicated by shading (dark = most, light = least). Shading ordered across Table S1-S3. Non-zero cells are bolded.

| Call/<br>Category                 | F3        |           | F4        |            | M4        |            | M6         |           | M8        |                       |
|-----------------------------------|-----------|-----------|-----------|------------|-----------|------------|------------|-----------|-----------|-----------------------|
|                                   | 01-03     | 05-06     | 01-03     | 05-06      | 01-03     | 05-06      | 01-03      | 05-06     | 01-03     | 05-06                 |
| <i>Stereotyped pulsed calls</i>   |           |           |           |            |           |            |            |           |           |                       |
| SD1-1a                            | <b>12</b> | <b>9</b>  | <b>15</b> | <b>8</b>   | <b>3</b>  | <b>27</b>  | <b>33</b>  | <b>3</b>  | 0         | 0                     |
| SD1-1b                            | <b>10</b> | <b>3</b>  | <b>12</b> | 2          | <b>6</b>  | <b>42</b>  | <b>18</b>  | <b>10</b> | 0         | 0                     |
| SD1-2a                            | <b>1</b>  | 0         | 0         | 0          | 0         | <b>6</b>   | 0          | 0         | 0         | 0                     |
| SD1-2b                            | 0         | 0         | 0         | 1          | <b>1</b>  | <b>16</b>  | 0          | <b>9</b>  | 0         | 0                     |
| SD1-3                             | 0         | 0         | 0         | <b>28</b>  | 0         | <b>2</b>   | 0          | 0         | 0         | 0                     |
| SD1-4                             | 0         | 0         | 0         | 0          | 0         | <b>9</b>   | 0          | 0         | 0         | 0                     |
| SD1-5a                            | <b>1</b>  | 0         | <b>1</b>  | 0          | 0         | 0          | 0          | 0         | 0         | 0                     |
| SD1-5b                            | <b>1</b>  | 0         | 0         | 0          | 0         | <b>2</b>   | <b>1</b>   | <b>2</b>  | 0         | 0                     |
| SD2-1                             | <b>2</b>  | 0         | <b>2</b>  | 2          | <b>1</b>  | <b>1</b>   | <b>4</b>   | 0         | 0         | 0                     |
| SD2-2                             | 0         | <b>1</b>  | 0         | <b>14</b>  | 0         | <b>1</b>   | <b>2</b>   | 0         | 0         | 0                     |
| SD3-1                             | <b>6</b>  | 0         | <b>3</b>  | <b>5</b>   | <b>18</b> | <b>42</b>  | <b>27</b>  | <b>13</b> | 0         | 0                     |
| SD4-1                             | <b>6</b>  | 0         | <b>2</b>  | 1          | <b>14</b> | <b>13</b>  | <b>30</b>  | <b>9</b>  | 0         | 0                     |
| SD5-1a                            | 0         | 0         | 0         | 0          | 0         | <b>4</b>   | 0          | 0         | 0         | 0                     |
| SD5-1b                            | <b>1</b>  | 0         | 0         | 0          | <b>6</b>  | <b>15</b>  | <b>4</b>   | <b>2</b>  | 0         | 0                     |
| SD5-2                             | 0         | 0         | 0         | 0          | <b>3</b>  | <b>17</b>  | <b>22</b>  | <b>8</b>  | 0         | <b>4</b>              |
| SD6-1                             | 0         | 0         | <b>2</b>  | 0          | 0         | 0          | 0          | <b>1</b>  | 0         | 0                     |
| SD7-1                             | 0         | 0         | <b>1</b>  | 0          | 0         | <b>1</b>   | 0          | 0         | 0         | 0                     |
| SD8-1                             | <b>2</b>  | 0         | 0         | 1          | 0         | <b>2</b>   | <b>2</b>   | <b>3</b>  | 0         | 0                     |
| SD8-2                             | <b>1</b>  | 0         | 0         | 2          | 0         | <b>6</b>   | <b>8</b>   | <b>7</b>  | 0         | 0                     |
| SD9-1                             | 0         | 0         | 0         | 0          | <b>2</b>  | 0          | <b>7</b>   | <b>8</b>  | 0         | 0                     |
| SD10-1                            | <b>1</b>  | 0         | 0         | 0          | 0         | <b>4</b>   | 0          | <b>1</b>  | 0         | 0                     |
| SD-RST                            | <b>37</b> | <b>12</b> | <b>51</b> | <b>43</b>  | <b>1</b>  | <b>6</b>   | <b>4</b>   | 0         | 0         | 0                     |
| <i>Categorized vocalizations*</i> |           |           |           |            |           |            |            |           |           |                       |
| VAR                               | 4         | 0         | <b>2</b>  | 0          | 0         | <b>25</b>  | <b>19</b>  | <b>22</b> | <b>4</b>  | <b>6</b>              |
| LFP                               | 0         | 0         | 0         | 0          | 0         | <b>8</b>   | 0          | 0         | <b>56</b> | <b>1</b>              |
| Whistle                           | 1         | 0         | 0         | 0          | 0         | 0          | <b>1</b>   | 0         | <b>21</b> | 0                     |
| <b>Total</b>                      | <b>86</b> | <b>25</b> | <b>91</b> | <b>106</b> | <b>58</b> | <b>249</b> | <b>182</b> | <b>98</b> | <b>81</b> | <b>11<sup>§</sup></b> |

Notes: \* VAR –Variable pulsed calls; LFP – low-frequency pulse trains. <sup>§</sup>Counts of calls in Icelandic-origin repertoire and categorized vocalizations. Stereotyped pulsed calls in M8's repertoire are given in Table S3.

**Table S2. Counts of the most common stereotyped calls produced by F1.** Categorized vocalizations are also given. Period indicated (01-03 for 2001-2003; 05-06 for 2005-2006). Rank order of the five most common call types or categories indicated by shading (dark = most, light = least). Shading ordered across Table S1-S3. Non-zero cells are bolded.

| Call/Category                     | F1        |            |
|-----------------------------------|-----------|------------|
|                                   | (01-03)   | (05-06)    |
| <i>Stereotyped pulsed calls</i>   |           |            |
| N9                                | <b>5</b>  | <b>3</b>   |
| N2                                | <b>2</b>  | <b>5</b>   |
| N8i                               | <b>15</b> | <b>27</b>  |
| N7i                               | <b>17</b> | <b>41</b>  |
| N4                                | <b>4</b>  | <b>6</b>   |
| N3 (Resting Call)                 | <b>19</b> | <b>64</b>  |
| <i>Categorized vocalizations*</i> |           |            |
| VAR                               | <b>10</b> | <b>7</b>   |
| LFP                               | 0         | <b>10</b>  |
| Whistle                           | 0         | 0          |
| <b>TOTAL</b>                      | <b>72</b> | <b>163</b> |

Notes: \* VAR –Variable pulsed calls; LFP – low-frequency pulse trains.

**Table S3. Counts of the most common stereotyped calls produced by M8, with matched calls produced by M4 and M6 in 2005-2006.** Categorized vocalization counts are given in Table S1; the sums in this table refer only to calls in M8's dialect. Repeated components encoded with an [R], e.g., U4(F[R]). Period indicated by whale (01-03 for 2001-2003; 05-06 for 2005-2006). Rank order of the five most common call types or categories indicated by shading (dark = most, light = least), with shading ordered across Table S1-S3. Non-zero cells are bolded.

| Call Type                       | M8         |           | M4       |          | M6       |           |
|---------------------------------|------------|-----------|----------|----------|----------|-----------|
|                                 | (01-03)    | (05-06)   | (01-03)  | (05-06)  | (01-03)  | (05-06)   |
| <i>Stereotyped pulsed calls</i> |            |           |          |          |          |           |
| U1(AB)                          | 0          | <b>4</b>  | 0        | <b>3</b> | 0        | <b>13</b> |
| U1(ABC)                         | <b>73</b>  | <b>22</b> | 0        | <b>1</b> | 0        | 0         |
| U1(ABC[R])                      | <b>65</b>  | 5         | 0        | <b>2</b> | 0        | 0         |
| U1(ABC[RM])                     | <b>19</b>  | <b>1</b>  | 0        | 0        | 0        | 0         |
| U1(AC[R])                       | <b>4</b>   | 0         | 0        | 0        | 0        | 0         |
| U1(C[R])                        | <b>3</b>   | <b>1</b>  | 0        | 0        | 0        | 0         |
| U2[R]*                          | <b>55</b>  | 0         | 0        | 0        | 0        | 0         |
| U3(DEB)                         | 0          | <b>1</b>  | 0        | <b>1</b> | 0        | 0         |
| U3(DEBC)*                       | <b>6</b>   | 0         | 0        | 0        | 0        | 0         |
| U3(DEBC[R])*                    | <b>19</b>  | 0         | 0        | 0        | 0        | 0         |
| U3(DEBC[RM])*                   | <b>7</b>   | 0         | 0        | <b>1</b> | 0        | 0         |
| U3(D[R])*                       | <b>9</b>   | 0         | 0        | 0        | 0        | 0         |
| U4(F[R])                        | <b>5</b>   | <b>14</b> | 0        | 0        | 0        | <b>14</b> |
| U4(FG)                          | <b>14</b>  | <b>17</b> | 0        | <b>1</b> | 0        | <b>51</b> |
| U4(FG[R])                       | <b>8</b>   | 2         | 0        | 0        | 0        | 0         |
| U4(FG[RM])*                     | <b>14</b>  | 0         | 0        | 0        | 0        | 0         |
| U Resting Call                  | <b>5</b>   | <b>9</b>  | 0        | 0        | 0        | 0         |
| <b>TOTAL</b>                    | <b>306</b> | <b>76</b> | <b>0</b> | <b>9</b> | <b>0</b> | <b>78</b> |

Notes: \* Indicates call types detected on a single day, 6/25/02.
